# 1 **Megaevolutionary dynamics in reptiles and the role of adaptive** 2 **radiations in evolutionary innovation**

3  
4 Tiago R. Simões<sup>1,\*</sup>, Oksana Vernygora<sup>2</sup>, Michael W. Caldwell<sup>2,3</sup> and Stephanie E. Pierce<sup>1</sup>

5  
6 <sup>1</sup> *Department of Organismic and Evolutionary Biology, Museum of Comparative Zoology,*  
7 *Harvard University, Cambridge, MA 02138, USA.*

8 <sup>2</sup> *Department of Biological Sciences, University of Alberta, Edmonton, Alberta T6G 2E9, Canada*

9 <sup>3</sup> *Department of Earth and Atmospheric Sciences, University of Alberta, Edmonton, Alberta T6G*  
10 *2E9, Canada.*

11 \*Corresponding Author: [tsimoes@fas.harvard.edu](mailto:tsimoes@fas.harvard.edu)

## 12 13 **Abstract**

14 Adaptive radiations are long believed to be responsible for the origin of phenotypic diversity and  
15 new body plans among higher clades in the fossil record. However, few studies have assessed  
16 rates of phenotypic evolution and disparity across broad scales of time to understand the  
17 evolutionary dynamics behind the origin of major clades, or how they relate to rates of molecular  
18 evolution. Here, we provide a total evidence approach to this problem using the largest available  
19 data set on diapsid reptiles. We find a strong decoupling between phenotypic and molecular rates  
20 of evolution, with many periods of accelerated phenotypic evolution or expansion of phenotypic  
21 disparity at the origin of major reptile clades and body plans that do not correspond to periods of  
22 adaptive radiation. We find heterogeneous rates of evolution during the acquisition of similarly

23 adapted functional types, and that the origin of snakes is marked by exceptionally high  
24 evolutionary rates.

25

26

27         The classical theory of adaptive radiation predicts that such events are characterized by  
28 high rates of phenotypic evolution, in combination with an expansion in phenotypic disparity and  
29 taxonomic diversity, as new species rapidly transforming to occupy available adaptive zones  
30 during times of ecological opportunity<sup>1,2</sup>. Across geological timescales, lineages undergoing  
31 exceptionally fast evolutionary rates would give rise to many new lineages, with some of these  
32 fast-evolving lineages potentially going extinct. Once niches are occupied, phenotypic disparity  
33 stabilizes and species diversification and evolutionary rates decrease and stabilize at lower  
34 levels<sup>1</sup>. It has long been assumed that the aftermath of mass extinctions would provide the ideal  
35 ecological opportunities for adaptive radiations<sup>1,3</sup>, such as the diversification of placental  
36 mammals after the Cretaceous-Palaeogene mass extinction (KPME), or the appearance of several  
37 reptile lineages in the fossil record following the Permian-Triassic mass extinction (PTME)<sup>2,3</sup>.  
38 Therefore, adaptive radiations have long been hypothesized to be responsible for the origin of  
39 most of biological diversity (in both taxonomic and phenotypic terms), especially regarding the  
40 origin of higher clades (e.g. families or orders) and new body plans, or what Simpson had  
41 originally referred to as “mega-evolutionary” processes<sup>4</sup>.

42         Although the concept of adaptive radiations is fundamental to our understanding of  
43 evolutionary theory, only recently have quantitative tools been developed to rigorously test its  
44 predictions at broad taxonomic and deep time scales in the evolutionary paleobiology. For  
45 instance, using both relaxed clocks and phylogenetic comparative methods various studies have

46 found high rates of evolution at the origin of major clades, including the early evolution of birds,  
47 arthropods, and crown placental mammals<sup>5-7</sup>. Fast evolutionary rates during putative periods of  
48 adaptive radiations following mass extinctions have also been recovered, such as the radiation of  
49 birds<sup>8</sup> and placental mammals<sup>6</sup> after the KPME, and archosaurs after the PTME<sup>9</sup>. Overall, these  
50 results support the central pillars of adaptive radiation theory concerning the origin and early  
51 radiation of major clades.

52 Nevertheless, there have been important recent challenges to this classical model of  
53 adaptive radiation<sup>1,2</sup>. It has been suggested the pattern of fast rates of evolution (“early burst”  
54 model) does not seem universal as it was not recovered during the origin and initial radiation of  
55 some major groups, such as teleost fishes or echinoids<sup>10,11</sup>. Importantly, very few studies include  
56 information from the fossil record and thus cannot examine such megaevolutionary events at  
57 sufficiently large scales of time in order to be able to fully comprehend the expected long-term  
58 dynamics, events before and after mass extinctions, or the origin of major clades (for notable  
59 exceptions, see<sup>11-13</sup>). When observed at broad scales of time, what may appear to be early bursts  
60 at the origin of major clades represent episodic events of rapid evolution (episodic radiations)  
61 throughout evolutionary history<sup>11</sup>. Additionally, there may exist long macroevolutionary gaps  
62 between the origin of clades and new body plans (associated with evolutionary rates and  
63 phenotypic disparity) and the actual period of taxonomic diversification (constructive  
64 radiations)<sup>14,15</sup>. Therefore, the question of whether adaptive radiations are truly responsible for  
65 the origin of most of biological and phenotypic diversity in the history of life and the origin of  
66 new body plans and phenotypic novelty remains open.

67 Here, we explore megaevolutionary dynamics on phenotypic and molecular evolution  
68 during two fundamental periods of reptile evolution: i) the origin and early diversification of the

69 major lineages of diapsid reptiles (lizards, snakes, tuataras, turtles, archosaurs, marine reptiles,  
70 among others) during the Permian and Triassic periods, as well as ii) the origin and evolution of  
71 lepidosaurs (lizards, snakes and tuataras) from the Jurassic to the present. The first provides  
72 answers concerning the origin of some of the most fundamental body plans in the history of  
73 reptile evolution, as well as the impact of the largest mass extinction event in the history of  
74 complex life (the Permian-Triassic Mass Extinction). The second reveals fundamental clues  
75 towards the evolution of one of the most successful vertebrate lineages on Earth today,  
76 comprising over 10,000 different species<sup>16</sup>. Our major questions for those two chronological and  
77 taxonomic categories include: What are the major deep time evolutionary patterns concerning  
78 evolutionary rates and phenotypic disparity? Do most periods of expansion of evolutionary rates  
79 and/or morphological disparity occur at the origin of major clades and new body plans?  
80 correspond to periods of adaptive radiation as predicted by the Simpsonian model? What periods  
81 can we identify as conforming to the classical model of adaptive radiation?. Our findings indicate  
82 that several periods of reptile evolution undergoing fast evolutionary rates do not conform to the  
83 expectations of a classical model of adaptive radiation; and that phenotypic novelties that have  
84 converged on similar functions may evolve at distinct rates of evolution.

85

## 86 **Results**

87 We expanded upon our recently published phylogenetic data set of early evolving diapsid  
88 reptiles and lepidosaurs (fossils and living)<sup>17</sup>, by adding new data on extant lizards and snakes to  
89 inform both phenotypic and molecular components of the tree. To estimate evolutionary rates in  
90 a well calibrated evolutionary tree, we integrated both phenotypic and molecular data using total-  
91 evidence dating (TED). This is a powerful approach in which tree topology, divergence times,

92 and phenotypic and molecular evolutionary rates, are jointly estimated. To account for potential  
93 variations in estimates of divergence times and evolutionary rates due to different software  
94 implementations, we conducted analyses using the the software Mr. Bayes<sup>18</sup> and the BEAST2  
95 evolutionary package<sup>19</sup>. However, the BEAST packages lack diversity sampling strategies,  
96 which is known to potentially overestimate divergence times with TED<sup>20,21</sup>. Our results with  
97 BEAST2 had relatively older divergence times compared to Mr. Bayes, especially among older  
98 nodes, which we attribute to this factor. For all our trees, see Supplementary Information  
99 (Supplementary Figs. S1-14 and Supplementary Data).

100 In our analyses we found evidence for deep root attraction (DRA)<sup>22</sup> that, when corrected  
101 (following<sup>22</sup>), increased the precision for divergence times in Mr. Bayes (Supplementary Figs.  
102 S4,5,14), and were also in much greater agreement with the fossil record—e.g. the divergence  
103 time for the diapsid-captorhinid split at the earliest Pennsylvanian (322 MYA), thus being close  
104 to the age of oldest known diapsid reptiles from the Late Pennsylvanian<sup>23</sup>. In contrast, even in  
105 analyses in which we tried to correct for DRA in BEAST2, the median age for the diapsid-  
106 captorhinid split was placed at the latest Devonian close to the Devonian-Carboniferous  
107 boundary (ca. 40 million years older), a time at which the first known tetrapods were  
108 diversifying onto land<sup>24</sup>, and thus, considerably more inconsistent with the fossil record  
109 (Supplementary Figs. S6,7). Overestimated divergence times are likely to affect estimates of  
110 evolutionary rates by extending chronological branch lengths. Therefore, our results and  
111 conclusions are primarily driven from the posterior tree estimates obtained from Mr. Bayes  
112 (results from BEAST2 are in our Supplementary Information).

113 Our initial non-clock Bayesian inference results with lepidosaurs indicate strong  
114 topological similarity between our molecular tree and a recent phylogenomic studies of

115 lepidosaurs<sup>25</sup>, especially concerning the paraphyly of amphisbaenians in both instances.  
116 Amphisbaenian paraphyly was also obtained by analyzing phenotypic data only. In each case,  
117 clades usually retrieved as the sister group to amphisbaenians (lacertids for molecular data and  
118 dibamids for phenotypic data) were found within amphisbaenians (Supplementary Figs. 1-3).  
119 Contrary to the results recovered using a previous version of this data set<sup>17</sup>, we find considerable  
120 agreement concerning early diapsid relationships between total evidence non-clock and clock  
121 trees with results from Mr. Bayes (Supplementary Figs. S3-5).

122         In all of our results from total-evidence relaxed clocks, inferred rates of phenotypic  
123 evolution have their medians and means similar to each other, with modal, median and mean  
124 values ~2.0 for early evolving diapsid lineages during the Permian up to the end of the Middle  
125 Triassic (Fig. 1a, 2). In lepidosaurs, phenotypic and molecular rates have similar distributions,  
126 and median, mean and modal values between 0.3 and 1 (Fig. 1b, 3). Further, in lepidosaurs there  
127 is no detectable correlation between phenotypic and molecular rates (Fig. 1c), demonstrating a  
128 strong decoupling between both rates (supporting the utilization of separate clocks for  
129 phenotypic and molecular data herein). Among the periods of elevated rates of molecular  
130 evolution, only the early part of the Jurassic is coincident with relatively fast rates of phenotypic  
131 evolution. But even in this case, the branches exhibiting fast phenotypic change are not the same  
132 undergoing fast molecular change (Figs. 3 and 4).

133         When observed across time, phenotypic rates of evolution in early diapsids are  
134 consistently accelerated (above one<sup>26</sup> and well above modal values) during most of the Permian,  
135 indicating elevated rates of evolution at the origin of the major lineages of diapsid reptiles (Fig.  
136 2a,c). This is coupled with relatively high rates of phenotypic disparity (Fig. 2b), although this  
137 disparity drops during the Guadalupian, and increases again during the Late Permian. It is

138 difficult to be precise when most of the disparity was lost during the Guadalupian, but the early  
139 Guadalupian depicts some of the lowest phenotypic evolutionary rates during the Permian, which  
140 then increase at the Guadalupian-Lopingian transition. The disparity results suggest that some  
141 level of extinction followed by recovery of phenotypic diversity happened during the Permian,  
142 and thus during early diapsid history. Taxonomic diversity of terrestrial non-flying tetrapods has  
143 been recently demonstrated to also drop during the Guadalupian, followed by an increase by the  
144 end of the Permian<sup>27</sup>. These results support recent hypotheses that early diapsid reptiles were  
145 affected by the more recently discovered Guadalupian mass extinction<sup>28</sup>. However, the increase  
146 in evolutionary rates at the Guadalupian-Lopingian boundary is much milder compared to the  
147 increase in phenotypic disparity, thus deviating from the expected signal from a recovery event  
148 from a mass extinction. We note that the amount of data available for this particular timeslot  
149 concerning early reptiles in the present data set may not be enough to fully capture a shifting  
150 evolutionary rate regime at a high scale of resolution. Future addition of Middle Permian reptiles  
151 to our data set will provide a stronger assessment of shifts in evolutionary rates and its  
152 relationship to shifts in phenotypic disparity and taxonomic diversity, and assessing the impact of  
153 the Guadalupian mass extinction in early diapsids.

154         Phenotypic rates decrease at the Permian-Triassic boundary, but rapidly increase during  
155 the first few million years of the Triassic, reaching their peak at the Middle Triassic,  
156 subsequently starting to decrease at the end of the middle Triassic (Fig. 2a). Phenotypic disparity  
157 drops during the Early Triassic but recovers quickly and expands above pre-extinction levels by  
158 the Middle Triassic (Fig. 2b). These fluctuations in evolutionary rates and disparity levels match  
159 the expected patterns of an adaptive radiation in the aftermath of mass extinctions, in which the  
160 occupation of available ecological niches is associated with an expansion of phenotypic disparity

161 and high evolutionary rates. This is further supported by the well-documented increase in the  
162 number of diapsid species and clades during the Triassic<sup>24</sup>.

163 In lepidosaurs (Figs 3), the beginning of the Jurassic marks the divergence of some of the  
164 deepest branches among major squamates clades, with elevated rates of phenotypic and  
165 molecular evolution at the origin of those clades as well as moderately high rates of phenotypic  
166 disparity. In general, those rates are lower compared to the rates observed at the origin and  
167 radiation of the major diapsid lineages during the Permian and Triassic. One major exception to  
168 the later trend, however, is the extremely high rate of phenotypic evolution at the origin of  
169 snakes. The branch leading to snakes is inferred to have the highest rates of phenotypic evolution  
170 among all the lineages of diapsid reptiles studied here (Figs. 2,3). High phenotypic rates during  
171 the early evolution of snakes were also recently found by another study based on extant snake  
172 taxa in a lepidosaur cranial shape data set<sup>29</sup>. Elevated rates of phenotypic evolution suggest an  
173 additional potential explanation for the difficulty in estimating the phylogenetic placement of  
174 snakes among squamates using phenotypic data only, besides the issue of multiple independent  
175 cases of the reduction of limbs among lizards. Interestingly, molecular rates of evolution on the  
176 lineage leading to snakes are not as elevated, although they become higher within snakes,  
177 especially when compared to molecular rates of other squamates lineages (Fig. 3,4).

178 Both phenotypic and molecular evolutionary rates among lepidosaurs stabilize during the  
179 Cretaceous, lying closer to modal levels (Fig. 3a,b), whereas phenotypic disparity increased  
180 slowly but steadily throughout the Cretaceous, reaching its highest peak during the Mesozoic at  
181 the end of the Cretaceous (Fig. 3b). This gradual increase in phenotypic disparity is supported by  
182 the fossil record, as the Late Cretaceous sees the first appearance and subsequent increase in  
183 phenotypic disparity and taxonomic diversity, of the aquatically adapted mosasaurians<sup>30</sup>,



184 appearance of the oldest preserved legged snakes<sup>31</sup>, along with the appearance of a large  
185 diversity of many crown group lizards in the Campanian and Maastrichtian of Mongolia<sup>32</sup>.

186 Lepidosaur phenotypic disparity drops following the Cretaceous-Paleogene mass  
187 extinction (Fig. 3b). Disparity, as well as phenotypic and molecular evolutionary rates (Fig. 3,4)  
188 remain relatively low during the Paleocene, with disparity increasing again during the Eocene,  
189 reaching pre-extinction levels. Phenotypic evolutionary rates do not see an equivalent increase to  
190 those observed for phenotypic disparity, although molecular rates are higher during the middle  
191 Eocene compared to earlier parts of the Paleogene. We lack sufficient data to estimate  
192 evolutionary rates during the Neogene, but rates among extant species remain relatively low  
193 while disparity is the highest in the history of lepidosaurs. The latter is supported by considering  
194 that squamates (essentially almost all of the extant diversity of lepidosaurs) comprise more than  
195 10,000 living species, a level of taxonomic diversity that is inferred to be the highest in the  
196 history of the group<sup>27</sup>, including ecologically diverse forms inhabiting almost any environment  
197 outside of the polar circles.

198

## 199 **Discussions**

200 Adaptive radiations are traditionally believed to be responsible for the origin of most of  
201 Earth's taxonomic and phenotypic diversity, usually associated with the first stages of the  
202 evolution of major clades<sup>1,4</sup>. However, in our results, we only detected one instance in the history  
203 of early diapsid reptiles in which phenotypic evolution seems to have been driven by an adaptive  
204 radiation—the recovery from the aftermath of the PTME during the Triassic. At other periods of  
205 time we see patterns that are better explained by other models of evolution. For instance, we  
206 observe an important macroevolutionary lag between the time of origin (and initial phenotypic

207 radiation) of the major diapsid lineages during the Permian and their later taxonomic  
208 diversification into several species within those major clades during the Triassic. This deviates  
209 from the classical model of adaptive radiation and instead matches the expectations of a pattern  
210 of early “disparification” without taxonomic richness (*sensu*<sup>33</sup>) that is quickly followed by  
211 periods of loss and recovery of phenotypic disparity during the Late Permian.

212       Among lepidosaurs, we detected some of the highest rates of evolution during the early  
213 part of the Jurassic, at the time of diversification of some of the deepest branches in squamate  
214 evolution and the origin of important new body plans (e.g. snakes), but marked by little  
215 taxonomic diversity<sup>27</sup>. In contrast, both phenotypic and molecular evolutionary rates were stable  
216 and at low levels during the Cretaceous, the period where most of the first examples of modern  
217 lineages of squamates show up in the fossil record: the peak of Mesozoic taxonomic richness is  
218 reached at the end of the Cretaceous<sup>27,34</sup>. Additionally, overall phenotypic disparity slowly  
219 increased between the Jurassic and the end of the Cretaceous, indicating a slow and steady  
220 buildup of phenotypic space. Such a substantial gap of 100 million years between initially high  
221 rates of evolution and the much later acquisition of taxonomic richness, associated with a  
222 continuous construction of morphospace, is better characterized by the more recently proposed  
223 constructive radiation model<sup>15</sup> that predicts that emergence of phenotypic novelties predate their  
224 taxonomic diversification by several millions of years. A major similar example is the fast  
225 evolution of phenotypic novelties and the exploration of morphospace during the early evolution  
226 of metazoans at the Cambrian explosion, generating many clades with few species, but with  
227 actual taxonomic diversification occurring much later in the history of animals<sup>14,15</sup>. This model  
228 notably, and importantly, departs from the classical adaptive radiation model that Simpson  
229 believed to be the predominant one governing megaevolutionary dynamics<sup>1</sup>.

230 In all of our results, phylogenetic branches with the highest phenotypic rates are  
231 frequently those within the early branches of newly evolving clades with markedly distinct new  
232 adaptive anatomical features characterizing new body plans (e.g., the emergence of turtles,  
233 marine reptiles, archosaurs, and snakes [Figs 2,3]). Early fast evolving branches in the history of  
234 new major clades were long predicted by Simpson (termed “tachytelic” lineages<sup>1</sup>), but were  
235 supposed to occur at periods of adaptive radiation. However, many bursts in phenotypic  
236 evolution are not observed here at times that can be characterized as adaptive radiations. Instead,  
237 we detected multiple bursts of phenotypic evolution throughout reptile history, as similarly  
238 observed during echinoid evolution <sup>11</sup>. In contrast, high rates are also observed during the  
239 acquisition of unique body plans that represent “failed” evolutionary experiments (lineages that  
240 did not reach high levels of diversification and went extinct soon after their origin) such as  
241 placodonts during early sauropterygian evolution (Figs 2).

242 Surprisingly, clades with very similar functional adaptations exhibit radically different  
243 rates of phenotypic evolution. For instance, protective/armored morphotypes (turtles and  
244 placodonts), aquatic morphotypes (ichthyosaurs, thalattosaurs, eosauroptrygians and  
245 mosasaurians), and serpentiform morphotypes (snakes and amphisbaenians) show highly distinct  
246 rates of evolution in their early history (Figs. 2,3), during the acquisition of their respective key  
247 phenotypic innovations. While the fastest evolving branch in early turtle evolution has rates up to  
248 2.15 times faster than median values for overall rates of phenotypic evolution, the fastest branch  
249 in placodonts is 8.3 times faster than the median for early diapsids. The most dramatic example  
250 is represented by the extremely similar but convergent morphology of amphisbaenians and  
251 snakes (Fig. 5), which have markedly different rates of evolution at their origin (5 times faster  
252 than median values for lepidosaurs in amphisbaenians vs 34.1 times faster in snakes). To our

253 knowledge, this is the first time that such levels of evolutionary rate heterogeneity among  
254 convergently evolving body plans has been detected. We note that, although usually  
255 characterized by the limblessness of its extant representatives, early snakes still retained partially  
256 developed limbs<sup>31</sup>, and many of the character changes contributing to those fast evolutionary  
257 rates relate to changes in the skull of both snakes and amphisbaenians, not limb evolution.  
258 Indeed, fast rates of skull shape evolution on the branch leading to snakes were found recently  
259 by<sup>29</sup>.

260         Contrary to the fast changes observed on phenotypic evolutionary rates, most deep nodes  
261 in lepidosaur evolution are marked by comparatively slower rates of molecular evolution (Fig.  
262 1c,3,4). Interestingly, rates of molecular evolution are quite low on the branch leading to snakes  
263 and other clades marked by high levels of phenotypic evolution. Among the few empirical  
264 studies comparing phenotypic and molecular rates of evolution across broad time scales, a  
265 similar pattern is observed in mammals (despite using different methodologies), with molecular  
266 rates kept at relatively low levels during the early evolution of placental mammals<sup>6</sup>. Those  
267 results indicate that the structural protein coding sequences tested herein for lepidosaurs, and also  
268 in the mammalian study, do not seem to have any detectable correlation to the substantial and  
269 fast phenotypic changes observed at the origin of new body plans in diapsid reptile and  
270 mammalian evolution.

271         Such decoupling of evolutionary rates between phenotypic and protein coding sequences  
272 at the origin of major clades and new body plans provide empirical support for recent hypotheses  
273 concerning the genetic basis for major phenotypic changes at large evolutionary timescales.  
274 Although early theories on the genetic drivers of major phenotypic changes invoked revolutions  
275 in protein coding gene frequencies<sup>1,35</sup>, genomic studies have revealed that substantial phenotypic

276 change appears to be mediated by changes on cis-(upstream) regulatory elements (CREs), and  
277 not by developmental gene duplication, or functional protein changes by mutations in coding  
278 sequences<sup>36-38</sup>. Therefore, our results from rates on protein coding sequences compared to rates  
279 of phenotypic evolution suggest that most genomic change associated with major phenotypic  
280 transitions in lepidosaurs (and possibly extinct reptile lineages that cannot be sampled for  
281 molecular data) might be located on conserved regulatory regions, as recently detected in the  
282 evolution of paleognathous birds<sup>37</sup>. Although outside the scope of the present study, we consider  
283 that the assessment of rates of evolution on conserved regulatory regions to be a fundamental  
284 next step on the investigation of the genomic basis for fast phenotypic change in reptiles.

285         Our results indicating exceptionally high phenotypic evolutionary rates at the origin of  
286 snakes further suggest that snakes not only possess a distinctive morphology within reptiles<sup>39</sup>,  
287 but also that the first steps towards the acquisition of the snake body plan was extremely fast.  
288 Therefore, snakes may hold some important goals towards understanding the processes driving  
289 phenotypic innovation in lepidosaurs. Some of such potential drivers may be represented by  
290 transposable elements (TEs). TEs can be found in large numbers on protein coding, intronic and  
291 regulatory sequences, eventually becoming exapted to novel functions, including regulation of  
292 gene expression within CREs in mammals<sup>40</sup>. The situation is even more dramatic in squamates,  
293 in which *Hox* gene clusters (which usually lack TEs and are conserved in most vertebrates to  
294 preserve the regulation of organismal development<sup>41</sup>) have an unparalleled accumulation of TEs  
295 compared to other vertebrates<sup>40,42,43</sup>. Transposable elements also have a role in the expansion of  
296 the number of microsatellites by microsatellite seeding<sup>44</sup>. In conformity with their large number  
297 of TEs, squamates have undergone microsatellite seeding during their evolution, and as a result,  
298 squamates have the highest abundance of microsatellites among vertebrates, with snakes, in

299 particular, having the highest microsatellite content among eukaryotes<sup>44</sup>. It is therefore possible  
300 that the unusually high number of TEs and microsatellites in squamates (snakes in particular),  
301 and their subsequent exaptation to novel functions in the genome (both in protein coding and  
302 regulatory regions) may be one of the fundamental drivers of phenotypic innovation in  
303 squamates<sup>40,42</sup>, explaining the exceptional rates of evolution observed in snakes.

304 The patterns and processes governing the origin of major clades and new morphotypes  
305 across the tree of life remain poorly understood. Our study is one of the very few assessing such  
306 megaevolutionary dynamics over broad taxonomic and chronological scales, revealing a limited  
307 role of adaptive radiations at the origin of the major diapsid reptile clades and body plans.  
308 Although reptile evolution shows the classic signatures of an adaptive radiation following the  
309 PTME, we also detected fast evolving lineages and expansion of phenotypic disparity at periods  
310 of time not marked by adaptive radiations, as well as rate heterogeneity during the early  
311 evolution of similar morphotypes. How generalizable these patterns are across other major  
312 metazoan lineages remains to be determined. However, our findings lend support to the more  
313 recently proposed alternative models for the radiation of major lineages<sup>15</sup>, and hint at a more  
314 complex scenario concerning the evolution of reptiles in deep time than previously thought.  
315

## 316 **Methods**

317 Most paleobiological studies assessing rates of phenotypic evolution have utilized  
318 parsimony inferred phylogenetic trees for an *a posteriori* estimate of changes along the branches  
319 of the tree [e.g.<sup>5,45,46</sup>]. Those estimates have provided valuable insights into evolutionary  
320 dynamics in deep time, especially concerning fossil lineages, and to the understanding of  
321 detailed patterns of phenotypic change. However, an essential limitation of this approach is how

322 to timescale the tree and the fact that frequently used parsimony trees minimize the number of  
323 changes along the branches, with both factors directly affecting rate estimates<sup>47</sup>. The integration  
324 of both phenotypic and molecular clocks in total evidence dating provides a powerful approach  
325 in which tree topology, divergence times, and phenotypic and molecular evolutionary rates, are  
326 jointly estimated, thus circumventing those limitations<sup>47,48</sup>. Further, estimates of divergence  
327 times and evolutionary rates can be averaged across the posterior sample of trees so that  
328 estimates take phylogenetic uncertainty into consideration. When those parameter estimates are  
329 taken directly from the Bayesian summary/consensus trees, those trees can be constructed based  
330 on the product of posterior probabilities or by selecting the posterior tree with highest posterior  
331 probability thus producing fully resolved trees upon which macroevolutionary parameters can be  
332 inferred without ambiguity, as is often the case with consensus trees derived from maximum  
333 parsimony (e.g., choosing between *acctran* vs. *deltran* approaches at polytomic nodes, or  
334 arbitrarily resolving polytomies). Additionally, different types of relaxed clock models are  
335 available (representing essentially distinct modes of evolution)<sup>49,50</sup>, and can be tested in order to  
336 determine which one has the better fit to the data set, thus allowing an essential simultaneous  
337 consideration of tempo and mode towards estimating evolutionary relationships and rates of  
338 evolution.

339 **Morphological and molecular data sets.** Here we updated the recently published diapsid-  
340 squamate data set of Simões *et al.*<sup>17</sup> in order to expand the representativeness of extant taxa,  
341 which are informative on both morphological and molecular data. Twelve additional taxa were  
342 added to this data set: nine extant species (the snakes *Rena humilis*, *Afrotyphlops punctatus*,  
343 *Python regius* and *Lichanura trivirgata*, the amphisbaenians *Amphisbaena alba*, *Trogonophis*  
344 *wiegmanni*, and three additional limbed lizards, *Tupinambis teguixin*, *Celestus stenurus* and

345 *Varanus albigularis*) and three fossil taxa (*Pleurosauros\_goldfussi*, *Gobiderma pulchrum* and  
346 *Cryptolacerta hassiaca*). Morphological data was collected for the additional taxa based on  
347 personal observations (by T.R.S.) and molecular data from the nine extant taxa were added to the  
348 molecular component of this data set<sup>17</sup>. Three taxa that operate as wildcards in the present data  
349 set, as identified in a previous study using the RogueNaRok algorithm<sup>17,51</sup>, were removed for the  
350 present analyses, namely *Paliguana whitei*, *Palaeagama vielhaueri*, and *Pamelina polonica*,  
351 resulting in considerable improvement on convergency of resolution of early diapsid  
352 relationships between non-clock and clock trees (see Results).

353 The molecular data set for the selected coding regions were obtained from GenBank  
354 (Supplementary Table S1, Supplementary Data 2). For *Python regius*, for which molecular data  
355 were not available, we used sequences of congeneric species, *P. molurus*. Sequences were  
356 aligned in MAFFT 7.245<sup>52</sup> online server using the global alignment strategy with iterative  
357 refinement and consistency scores (G-INS-i). Molecular sequences from all extant taxa were  
358 analyzed for the best partitioning scheme and model of evolution using PartitionFinder2<sup>53</sup> under  
359 Bayesian information criterion (BIC).

360 **Bayesian inference analyses.** Both non-clock and clock based Bayesian inference analyses  
361 were conducted using Mr. Bayes v. 3.2.6<sup>18</sup> and the BEAST2 package<sup>19</sup> using high performance  
362 computing resources made available through Compute Canada. Molecular partitions were  
363 analyzed using the models of evolution obtained from PartitionFinder2<sup>53</sup> (see dataset), and the  
364 morphological partition was analyzed with the Mkv model.

365 **Time-calibrated relaxed clock Bayesian inference analyses.** We implemented “total-  
366 evidence-dating” (TED) using the fossilized birth-death tree model with sampled ancestors  
367 (FBD-SA), under relaxed clock models in Mr. Bayes v.3.2.6<sup>21,54</sup>—100 million generations, with



368 four independent runs with six chains each, and a gamma prior of rate variation across  
369 characters. We conducted the same analysis using the BEAST2 package<sup>19</sup>, with four independent  
370 runs, also with a gamma prior of rate variation across characters. To ensure that each  
371 independent single chain run in BEAST2 reached stationarity, we increased length of each  
372 analysis to 200 million generations. Runs were sampled every 500 generation with the initial  
373 55% of samples removed as ‘burn-in’. We provided an informative prior to the base of the clock  
374 rate based on the previous non-clock analysis: the median value for tree height in substitutions  
375 from posterior trees divided by the age of the tree based on the median of the distribution for the  
376 root prior:  $23.8582/325.45 = 0.0733$ , in natural log scale =  $-2.61308$ . We chose to use the  
377 exponent of the mean to provide a broad standard deviation:  $e^{0.0733} = 1.076053$ . The vast  
378 majority of our calibrations were based on tip-dating, which accounts for the uncertainty in the  
379 placement of fossil taxa and avoids the issue of constraining priors on taxon relationships when  
380 implementing bound estimates for node-based age calibrations<sup>54</sup>. The range of the stratigraphic  
381 occurrence of the fossils used for tip-dating here were used to inform the uniform prior  
382 distributions on the age of those same fossil tips (thus allowing for uncertainty on the age of the  
383 fossils).

384 Convergence of independent runs was assessed using: average standard deviation of split  
385 frequencies (ASDSF  $\sim 0.01$ ), potential scale reduction factors [PSRF  $\approx 1$  for all parameters] and  
386 effective sample size (ESS) for each parameter was greater than 200 for Mr. Bayes. Independent  
387 BEAST runs were combined using LogCombiner v2.5.1 (available with the BEAST2 package)  
388 and checked for stationarity and convergence in Tracer v. 1.7.1<sup>55</sup>. The ESS value of each  
389 parameter was greater than 200 and ASDSF  $< 0.01$ .

390       **Testing for the best fitting clock prior.** Distinct clock models allow for different  
391 assumptions regarding the predominant tempo and mode of evolution. While strict clocks  
392 presume constant rates of evolution across lineages, relaxed clock models allow for changes in  
393 the rate of evolution among lineage. For instance, relaxed clocks include models where rates at  
394 each branch in a phylogeny is drawn independently and identically from an underlying rate  
395 distribution (uncorrelated clocks), to others where the rate at a particular branch is dependent on  
396 the rates on the neighbouring branches (autocorrelated clocks)—see<sup>49,50</sup> for modelled  
397 comparisons. Therefore, in uncorrelated clocks rates are free to change more dramatically among  
398 neighbouring branches, resulting in shorter branch lengths and higher rates than autocorrelated  
399 clock models<sup>54</sup>, and thus reflecting a more punctuated model of evolution compared to the more  
400 gradualistic model represented by autocorrelated rates<sup>50</sup>.

401       In order to detect the most appropriate clock models, we used Bayes factors (BF) applying  
402 model fitting analyses using the stepping-stone sampling strategy to assess the marginal model  
403 likelihoods<sup>56</sup> for each clock model for the current data set (50 steps for 100 million generations  
404 in Mr. Bayes and 100 million generations in BEAST2 (two runs each). We tested between strict  
405 clock models and relaxed clock models. Relaxed clock models were further tested for linked  
406 clock models (where morphological and molecular partitions share the same clock, and therefore  
407 variations on the rate of evolution) and unlinked clock models, allowing for the clock rates to  
408 vary independently among the morphological and molecular partitions of the data set. In Mr.  
409 Bayes, we found a considerably stronger fit for relaxed clock models against a strict clock model  
410 (BF>2000), and a stronger fit (BF >400) for unlinked clock models, thus supporting the  
411 treatment of morphological and molecular rates independently. The results are expected given  
412 the broad scale of the present data set, which is inclusive of several reptile families sampled over

413 the last 300 million years and characters from multiple regions of the phenotype and genotype.  
414 Finally, an independent gamma rate (IGR) unlinked relaxed-clock model was favoured relative  
415 to the autocorrelated clock model (BF =150), indicating the data supports a model allowing more  
416 disparate shifts in evolutionary rates across lineages.

417 The stepping-stone analyses conducted in BEAST2 ran for 100 million generations, with  
418 some of the longest runs (using random local clocks) taking 37 days to complete in a computer  
419 cluster, and yet they failed to reach the stationarity phase. The large taxonomic sampling of our  
420 data set (which increases computational time exponentially) compared to most other total  
421 evidence data sets analysed under BEAST2 indicate that the sheer size of this data set prevents a  
422 reasonable assessment of marginal likelihoods independently from the ones performed under Mr.  
423 Bayes. Therefore, for subsequent analyses using BEAST2 we implemented the two uncorrelated  
424 relaxed clock models available in BEAST2 (lognormal and exponential), given the much  
425 stronger fit of uncorrelated relaxed clock models over other clock models in Mr. Bayes. Further,  
426 relaxed clock implementations can recover homogeneous rates of evolution when the best fit  
427 model is supposed to be clock like<sup>57</sup>, indicating relaxed clock models can fit a variety of different  
428 evolutionary scenarios.

429 **Divergence time estimates and evolutionary rates.** A “diversity” sampling tree prior is  
430 implemented in Mr. Bayes v. 3.2.6, but it is not yet available on BEAST2. Accounting for  
431 “diversity” sampling impacts tree priors<sup>20</sup>, affecting divergence time precision and accuracy  
432<sup>21,54</sup>. The results from our initial relaxed clock analyses show considerably (and unreasonably)  
433 older divergence times from the trees using BEAST2 compared to Mr. Bayes (tens of millions of  
434 years older). Considering the main prior choices were the same between the two software  
435 packages, we attribute the much older divergence times in BEAST2 to not accounting for

436 diversity sampling in total evidence analyses, as already demonstrated by previous studies<sup>21,54</sup>.  
437 Additionally, factors such as vague priors, limitations on currently available models of  
438 morphological evolution as well as conflict between the morphological and molecular signal may  
439 result in pushing divergence times further back in time (exceptionally long ghost lineages),  
440 especially among the deepest nodes on broad scale phylogenies, contributing to the phenomenon  
441 of “deep root attraction” (DRA)<sup>22</sup>. It is possible to minimize this impact by providing  
442 informative priors that decrease the likelihood of long ghost lineages, such as modelling higher  
443 diversification rates or low extinction probability. This correction for DRA could potentially  
444 provide a tool for correcting the overestimation of divergence times in BEAST2, as reported  
445 above. Following Ronquist *et al.*<sup>22</sup>, we implemented one of those strategies (specifically, giving  
446 higher probabilities of low extinction by placing a Beta (1,100) on the turnover probability prior)  
447 to assess its impact on divergence times on the analyses conducted on both Mr. Bayes and  
448 BEAST2.

449 Implementing this strategy highly increased the precision of divergence times among the  
450 oldest nodes on the summary tree from Mr. Bayes, and also brought divergence times for the  
451 oldest nodes on the tree into much greater agreement with the fossil record (see Results). For  
452 instance, in the analysis with no DRA correction average variance of divergence times among  
453 the 50 oldest nodes taken from the posterior trees was 143.07 million years (myr), whereas it was  
454 58.88myr among the 50 youngest nodes (excluding extant nodes); in the analysis with DRA  
455 correction those respective values decreased to 25.3myr and 16.49myr (see also ranges of  
456 95%HPD between those analyses in Supplementary Figs 4,5). Therefore, we used the results  
457 from the DRA corrected analyses to report divergence times and evolutionary rates. Notably,  
458 even accounting for low extinction probability to reduce DRA in our analyses using BEAST2,

459 we noticed no visible difference in divergence times among the oldest nodes. Divergence times  
460 were still considerably older (frequently 10-20 million years older) among intermediary and  
461 older nodes in the maximum clade credibility tree compared to the summary tree from Mr. Bayes  
462 (Supplementary Figs 6,7). This suggests that informative tree priors are not enough to avoid  
463 overestimating divergence times when diversity sampling is not taken into account, at least in  
464 BEAST2.

465 Branch length estimates and tree calibration invariably impact estimates of absolute rate  
466 values and correlating rates with specific periods of time in the geological record is affected  
467 when divergence times are biased. As a result, our main results report only the trees from Mr.  
468 Bayes, where divergence times are not being overestimated by DRA.

469 **Data set adaptation for morphological disparity analyses.** Phylogenetic morphological  
470 characters provide a large number of variables that can be easily utilized for morphospace  
471 analysis and have been implemented in a large variety of studies on different taxonomic groups.  
472 Importantly, discrete phylogenetic characters can easily capture the disparate morphological  
473 variation that is observed among higher taxa (as observed in broad scale phylogenies, such as in  
474 the present data set) [e.g. <sup>58</sup>]. Yet, important adaptations and considerations of phylogenetic data  
475 sets need to be taken into account for such kind of analyses, as further described below.

476 Large amounts of missing data, usually above 25%, considerably reduce the overall distance  
477 between taxa that can be captured on ordination spaces on both empirical and simulated data sets  
478 <sup>47,59</sup>. To reduce the negative impact of missing data, we removed all characters with more than  
479 30% of missing data from the data set, which resulted in a total of 19% missing data on the final  
480 data set—safely below the threshold of 25% <sup>47,59,60</sup>. Additionally, inapplicable characters are a  
481 big conceptual problem to construct a morphospace. Taxa with inapplicable characters will have

482 their placement enforced upon a space they do not reside in (which is conceptually very different  
483 from missing data—when they reside in that space, but we currently lack data to place them)<sup>60</sup>.  
484 Deleting all inapplicable characters would further decrease the number of utilized characters at  
485 about 30%, thus reducing the span of morphological representation in the data set. Therefore, to  
486 avoid inapplicable characters, but keep minimal representation, we deleted all characters that  
487 were inapplicable to more than 5% of taxa, rescored the remaining cells as missing data.  
488 Polymorphisms were converted into NA scores (treated as “?” during analyses), following  
489 previous recommendations and based on the reasoning above<sup>58,60</sup>.

490 Autapomorphies, if unevenly sampled across taxa, may also contribute to bias distance  
491 matrices. However, if autapomorphies are uniformly distributed across terminal taxa, then their  
492 overall effect is to increase overall pairwise distance between terminal taxa uniformly, therefore  
493 not creating biasing the interpretation of the data<sup>61</sup>. In the present data set, there are some  
494 directly observed autapomorphies, which were already excluded during the removal of characters  
495 with large amounts of missing data (see below). Having no remaining autapomorphies in the data  
496 set is another way of having a uniform distribution of autapomorphies, guaranteeing that no  
497 taxon will have additional dimensions separating it from other taxa in the dissimilarity matrix  
498 and morphospace ordination procedure.

499 **Intertaxon distance matrix and ordination matrix.** The procedures above resulted in a  
500 final reduced matrix of 138 taxa and 105 characters. This number of characters is more than  
501 sufficient to provide reasonable estimates of disparity<sup>62</sup>. This data set (data set 1) was used to  
502 construct a morphospace for all sampled clades of reptiles. A second version of the data set (data  
503 set 2) was adapted to compare disparity across time. Since most post-Triassic taxa in the data  
504 matrix are lepidosaurs, we deleted the only three non-lepidosaurian post-Triassic taxa

505 (*Kayentachelys*, *Philydrosaurus* and *Champsosaurus*), in order to distinguish disparity across  
506 time among early diapsids clades in general (between the Late Carboniferous and Late Triassic)  
507 and disparity across time among lepidosaurs (Early Jurassic to the present). Therefore, data set 2  
508 contained 135 taxa and 105 characters (and the original time calibrated tree was also pruned of  
509 those three taxa to match the reduced data set).

510 Using the reduced data sets and the time calibrated trees, we constructed an intertaxon  
511 distance matrix **D** and an ordination matrix using principal coordinate analysis (PCoA— or  
512 classical multidimensional scaling). We implemented MORD as our method of estimating  
513 pairwise taxon distances for the distance matrix **D** and the subsequent ordination matrix, made  
514 available through the Claddis R package <sup>47</sup>, implementing Cailliez’s correction for negative  
515 eigenvalues. Additionally, we increased our sample size by including internal nodes using  
516 ancestral state reconstructions through the recently developed pre-OASE1 method <sup>63</sup>. This  
517 procedure provides a much better approximation of the true morphospace when compared to  
518 methods to reconstruct ancestral nodes in most previous disparity studies using ancestral state  
519 reconstructions <sup>63</sup>.

520 **Morphological disparity measures.** Here, we used the sum of the variances (a post-  
521 ordination metric), which is comparatively robust to sample size and is not affected by the  
522 orientation of the coordinate axes of the ordination analysis <sup>58,62</sup>. Importantly, only post-  
523 ordination methods can be used to produce a morphospace projection. Further, post-ordination  
524 methods have been more widely used in the literature making our results more directly  
525 comparable to previous studies. Since PCo scores based on phylogenetic data usually have the  
526 first principle axis representing a small proportion of the total variance (usually the first two PCo  
527 representing less than 50% of total variance), morphospace representation using PCo scores

528 should be taken with caution. This problem can be avoided in our assessment of disparity across  
529 time (our main measure of both chronological and taxonomic changes in disparity), in which it is  
530 possible to take into account all axes of variation to estimate morphological disparity. Nonmetric  
531 multidimensional scaling was not used to preserve the metric properties of the dissimilarity  
532 matrix. To measure morphological disparity across successive time bins, we used the R package  
533 `dispRity`<sup>64</sup> to subdivide the data across time bins. Our data is not evenly sampled across time, as  
534 it was designed to maximize taxonomic representation across stratigraphic intervals. Therefore,  
535 uniform time bins would create more heterogenic sample sizes across bins with some bins  
536 containing drastically low sample values, besides not capturing important geological boundaries  
537 reflective of important environmental shifts and mass extinctions. For those reasons, we chose  
538 time bins approximating stratigraphic intervals to subdivide our data chronologically, which  
539 enables capturing changes across major mass extinctions at stratigraphic boundaries (e.g.  
540 Permian-Triassic and Cretaceous-Palaeogene mass extinctions), and also less heterogenic sample  
541 sizes across the bins.

542 Additional methodological details can be found in Supplementary Methods in the  
543 Supplementary Information file. Supplementary Data S1-S5 (data sets in Nexus format) along  
544 with trees, log files, prior parameters and posterior parameter values described in the results and  
545 figures can be found online at: NNNNNNNNNNN

546

## 547 **References**

- 548 1 Simpson, G. G. *The Major Features of Evolution*. (Columbia University Press, 1953).  
549 2 Stroud, J. T. & Losos, J. B. Ecological opportunity and adaptive radiation. *Annu. Rev.*  
550 *Ecol. Evol. Syst.* **47**, 507-532 (2016).



- 551 3 Erwin, D. H. *Extinction—How life on Earth nearly ended 250 million years ago. Updated*  
552 *Edition*. 320 (Princeton University Press, 2015).
- 553 4 Simpson, G. G. *Tempo and mode in evolution*. (Columbia University Press, 1944).
- 554 5 Brusatte, Stephen L., Lloyd, Graeme T., Wang, Steve C. & Norell, Mark A. Gradual  
555 Assembly of Avian Body Plan Culminated in Rapid Rates of Evolution across the  
556 Dinosaur-Bird Transition. *Curr. Biol.* **24**, 2386-2392 (2014).
- 557 6 Halliday Thomas, J. D. *et al.* Rapid morphological evolution in placental mammals post-  
558 dates the origin of the crown group. *Proc. R. Soc. Lond., Ser. B: Biol. Sci.* **286**, 20182418  
559 (2019).
- 560 7 Lee, M. S. Y., Soubrier, J. & Edgecombe, G. D. Rates of phenotypic and genomic  
561 evolution during the Cambrian explosion. *Curr. Biol.* **23**, 1889-1895 (2013).
- 562 8 Felice, R. N. & Goswami, A. Developmental origins of mosaic evolution in the avian  
563 cranium. *Proc. Natl. Acad. Sci. USA* **115**, 555-560 (2018).
- 564 9 Ezcurra, M. D. & Butler, R. J. The rise of the ruling reptiles and ecosystem recovery from  
565 the Permo-Triassic mass extinction. *Proc. R. Soc. B* **285**, 20180361 (2018).
- 566 10 Clarke, J. T., Lloyd, G. T. & Friedman, M. Little evidence for enhanced phenotypic  
567 evolution in early teleosts relative to their living fossil sister group. *Proc. Natl. Acad. Sci.*  
568 *USA* **113**, 11531-11536 (2016).
- 569 11 Hopkins, M. J. & Smith, A. B. Dynamic evolutionary change in post-Paleozoic echinoids  
570 and the importance of scale when interpreting changes in rates of evolution. *Proc. Natl.*  
571 *Acad. Sci. USA* **112**, 3758-3763 (2015).
- 572 12 Wright, D. F. Phenotypic Innovation and Adaptive Constraints in the Evolutionary  
573 Radiation of Palaeozoic Crinoids. *Sci. Rep.* **7**, 13745 (2017).

- 574 13 Close, R. A., Friedman, M., Lloyd, G. T. & Benson, R. B. Evidence for a mid-Jurassic  
575 adaptive radiation in mammals. *Curr. Biol.* **25**, 2137-2142 (2015).
- 576 14 Erwin, D. H. *et al.* The Cambrian Conundrum: Early Divergence and Later Ecological  
577 Success in the Early History of Animals. *Science* **334**, 1091-1097 (2011).
- 578 15 Erwin, D. H. Novelty and innovation in the history of life. *Curr. Biol.* **25**, R930-R940  
579 (2015).
- 580 16 Uetz, P. & Hošek, J. *The Reptile Database*, <<http://www.reptile-database.org>> (2019).
- 581 17 Simões, T. R. *et al.* The origin of squamates revealed by a Middle Triassic lizard from the  
582 Italian Alps. *Nature* **557**, 706-709 (2018).
- 583 18 Ronquist, F. *et al.* MrBayes 3.2: efficient Bayesian phylogenetic inference and model  
584 choice across a large model space. *Syst. Biol.* **61**, 539-542 (2012).
- 585 19 Bouckaert, R. *et al.* BEAST 2: A Software Platform for Bayesian Evolutionary Analysis.  
586 *PLoS Comput Biol* **10**, e1003537 (2014).
- 587 20 Höhna, S., Stadler, T., Ronquist, F. & Britton, T. Inferring Speciation and Extinction  
588 Rates under Different Sampling Schemes. *Mol. Biol. Evol.* **28**, 2577-2589 (2011).
- 589 21 Zhang, C., Stadler, T., Klopstein, S., Heath, T. A. & Ronquist, F. Total-Evidence Dating  
590 under the Fossilized Birth–Death Process. *Syst. Biol.* **65**, 228-249 (2016).
- 591 22 Ronquist, F., Lartillot, N. & Phillips, M. J. Closing the gap between rocks and clocks  
592 using total-evidence dating. *Phil. Trans. R. Soc. B* **371**, 20150136 (2016).
- 593 23 Reisz, R. R. A diapsid reptile from the Pennsylvanian of Kansas. *University of Kansas*  
594 *Museum of Natural History Special Publication* **7**, 1-74 (1981).
- 595 24 Benton, M. J. *Vertebrate Paleontology*. Third edn, (Blackwell, 2005).

- 596 25 Streicher, J. W. & Wiens, J. J. Phylogenomic analyses of more than 4000 nuclear loci  
597 resolve the origin of snakes among lizard families. *Biol. Lett.* **13** (2017).
- 598 26 Ronquist, F., Huelsenbeck, J. & Teslenko, M. Draft MrBayes version 3.2 manual:  
599 tutorials and model summaries. *Distributed with the software from [http://brahms.](http://brahms.biology.rochester.edu/software.html)*  
600 *biology.rochester.edu/software.html* (2011).
- 601 27 Close, R. A. *et al.* Diversity dynamics of Phanerozoic terrestrial tetrapods at the local-  
602 community scale. *Nature Ecology & Evolution* (2019).
- 603 28 Day, M. O. *et al.* When and how did the terrestrial mid-Permian mass extinction occur?  
604 Evidence from the tetrapod record of the Karoo Basin, South Africa. *Proc. R. Soc. Lond.,*  
605 *Ser. B: Biol. Sci.* **282**, 20150834 (2015).
- 606 29 Watanabe, A. *et al.* Ecomorphological diversification in squamates from conserved  
607 pattern of cranial integration. *Proc. Natl. Acad. Sci. USA* **116**, 14688-14697 (2019).
- 608 30 Lee, M. S. Y. & Caldwell, M. W. *Adriosaurus* and the affinities of mosasaurs,  
609 dolichosaurs and snakes. *J. Paleontol.* **74**, 915-937 (2000).
- 610 31 Caldwell, M. W. & Lee, M. S. Y. A snake with legs from the marine Cretaceous of the  
611 Middle East. *Nature* **386**, 705-709 (1997).
- 612 32 Gao, K.-Q. & Norell, M. A. Taxonomic composition and systematics of Late Cretaceous  
613 lizard assemblages from Ukhaa Tolgod and adjacent localities, Mongolian Gobi Desert.  
614 *Bull. Am. Mus. Nat. Hist.* **249**, 1-118 (2000).
- 615 33 Simões, M. *et al.* The Evolving Theory of Evolutionary Radiations. *Trends Ecol. Evol.*  
616 **31**, 27-34 (2016).

- 617 34 Cleary, T. J., Benson, R. B., Evans, S. E. & Barrett, P. M. Lepidosaurian diversity in the  
618 Mesozoic–Palaeogene: the potential roles of sampling biases and environmental drivers.  
619 *Royal Soc. Open Sci.* **5**, 171830 (2018).
- 620 35 Gould, S. J. *The Structure of Evolutionary Theory*. First edn, (Harvard University Press,  
621 2002).
- 622 36 Carroll, S. B. Evo-devo and an expanding evolutionary synthesis: a genetic theory of  
623 morphological evolution. *Cell* **134**, 25-36 (2008).
- 624 37 Sackton, T. B. *et al.* Convergent regulatory evolution and loss of flight in paleognathous  
625 birds. *Science* **364**, 74-78 (2019).
- 626 38 Brawand, D. *et al.* The genomic substrate for adaptive radiation in African cichlid fish.  
627 *Nature* **513**, 375 (2014).
- 628 39 Caldwell, M. W. *The Origin of Snakes: Morphology and the Fossil Record*. (CRC Press,  
629 2019).
- 630 40 Piskurek, O. & Jackson, D. J. Transposable elements: from DNA parasites to architects of  
631 metazoan evolution. *Genes* **3**, 409-422 (2012).
- 632 41 Simons, C., Makunin, I. V., Pheasant, M. & Mattick, J. S. Maintenance of transposon-  
633 free regions throughout vertebrate evolution. *BMC Genomics* **8**, 470 (2007).
- 634 42 Di-Poi, N. *et al.* Changes in Hox genes' structure and function during the evolution of  
635 the squamate body plan. *Nature* **464**, 99-103 (2010).
- 636 43 Guerreiro, I. *et al.* Reorganisation of Hoxd regulatory landscapes during the evolution of  
637 a snake-like body plan. *Elife* **5**, e16087 (2016).
- 638 44 Pasquesi, G. I. M. *et al.* Squamate reptiles challenge paradigms of genomic repeat  
639 element evolution set by birds and mammals. *Nat. Comm.* **9**, 2774 (2018).

- 640 45 Lloyd, G. T., Wang, S. C. & Brusatte, S. L. Identifying heterogeneity in rates of  
641 morphological evolution: Discrete character change in the evolution of lungfish  
642 (Sarcopterygii; Dipnoi). *Evolution* **66**, 330-348 (2012).
- 643 46 Wang, M. & Lloyd, G. T. Rates of morphological evolution are heterogeneous in Early  
644 Cretaceous birds. *Proc. R. Soc. Lond., Ser. B: Biol. Sci.* **283** (2016).
- 645 47 Lloyd, G. T. Estimating morphological diversity and tempo with discrete character-taxon  
646 matrices: implementation, challenges, progress, and future directions. *Biol. J. Linn. Soc.*  
647 **118**, 131-151 (2016).
- 648 48 Lee, M. S. Y., Cau, A., Naish, D. & Dyke, G. J. Sustained miniaturization and anatomical  
649 innovation in the dinosaurian ancestors of birds. *Science* **345**, 562-566 (2014).
- 650 49 Ho, S. Y. & Duchêne, S. Molecular-clock methods for estimating evolutionary rates and  
651 timescales. *Mol. Ecol.* **23**, 5947-5965 (2014).
- 652 50 Drummond, A. J., Ho, S. Y. W., Phillips, M. J. & Rambaut, A. Relaxed Phylogenetics  
653 and Dating with Confidence. *PLoS Biol* **4**, e88 (2006).
- 654 51 Aberer, A. J., Krompass, D. & Stamatakis, A. Pruning Rogue Taxa Improves  
655 Phylogenetic Accuracy: An Efficient Algorithm and Webservice. *Syst. Biol.* **62**, 162-166  
656 (2013).
- 657 52 Katoh, K. & Standley, D. M. MAFFT Multiple Sequence Alignment Software Version 7:  
658 Improvements in Performance and Usability. *Mol. Biol. Evol.* **30**, 772-780 (2013).
- 659 53 Lanfear, R., Frandsen, P. B., Wright, A. M., Senfeld, T. & Calcott, B. PartitionFinder 2:  
660 New Methods for Selecting Partitioned Models of Evolution for Molecular and  
661 Morphological Phylogenetic Analyses. *Mol. Biol. Evol.* (2016).

- 662 54 Ronquist, F. *et al.* A total-evidence approach to dating with fossils, applied to the early  
663 radiation of the Hymenoptera. *Syst. Biol.* **61**, 973-999 (2012).
- 664 55 Rambaut, A., Suchard, M. A., Xie, D. & Drummond, A. J. *Tracer v1.7*, Available from  
665 <http://beast.bio.ed.ac.uk/Tracer>, 2018).
- 666 56 Xie, W., Lewis, P. O., Fan, Y., Kuo, L. & Chen, M.-H. Improving marginal likelihood  
667 estimation for Bayesian phylogenetic model selection. *Syst. Biol.* **60**, 150-160 (2011).
- 668 57 Paterson, J. R., Edgecombe, G. D. & Lee, M. S. Y. Trilobite evolutionary rates constrain  
669 the duration of the Cambrian explosion. *Proc. Natl. Acad. Sci. USA* **116**, 4394-4399  
670 (2019).
- 671 58 Hughes, M., Gerber, S. & Wills, M. A. Clades reach highest morphological disparity  
672 early in their evolution. *Proc. Natl. Acad. Sci. USA* **110**, 13875-13879 (2013).
- 673 59 Flannery Sutherland, J., T., Moon, B., C., Stubbs, T., L. & Benton, M., J. Does  
674 exceptional preservation distort our view of disparity in the fossil record? *Proc. R. Soc.*  
675 *Lond., Ser. B: Biol. Sci.* **286**, 20190091 (2019).
- 676 60 Gerber, S. Use and misuse of discrete character data for morphospace and disparity  
677 analyses. *Palaeontology* (2018).
- 678 61 Cisneros, J. C. & Ruta, M. Morphological diversity and biogeography of procolophonids  
679 (Amniota: Parareptilia). *J. Syst. Palaeont.* **8**, 607-625 (2010).
- 680 62 Ciampaglio, C. N., Kemp, M. & McShea, D. W. Detecting changes in morphospace  
681 occupation patterns in the fossil record: characterization and analysis of measures of  
682 disparity. *Paleobiology* **27**, 695-715 (2001).
- 683 63 Lloyd, G. T. Journeys through discrete-character morphospace: synthesizing phylogeny,  
684 tempo, and disparity. *Palaeontology* **61**, 637-645 (2018).

685 64      Guillerme, T. dispRity: A modular R package for measuring disparity. *Methods Ecol.*  
686           *Evol.* **9**, 1755-1763 (2018).

687      **Supplementary Information** is linked to the online version of the paper at NNNNNNNNNN

688      **Acknowledgements.** T.R.S. was supported by an Alexander Agassiz Postdoctoral Fellowship  
689      (Museum of Comparative Zoology, Harvard University). O.V. was supported by the Natural  
690      Science and Engineering Research Council of Canada (NSERC) Discovery Grant 327448 to  
691      Alison M. Murray and Alberta Ukrainian Centennial Scholarship. We also thank several curators  
692      that allowed us to have access to all the specimens analysed in this study.

693      **Author Contributions.** T.R.S. led on manuscript writing, morphological dataset construction  
694      and conducted disparity analyses; T.R.S. and O.V. performed molecular sequence alignment and  
695      phylogenetic analyses; all authors contributed to discussions and manuscript editing.

696

697

698 **Figures and captions**

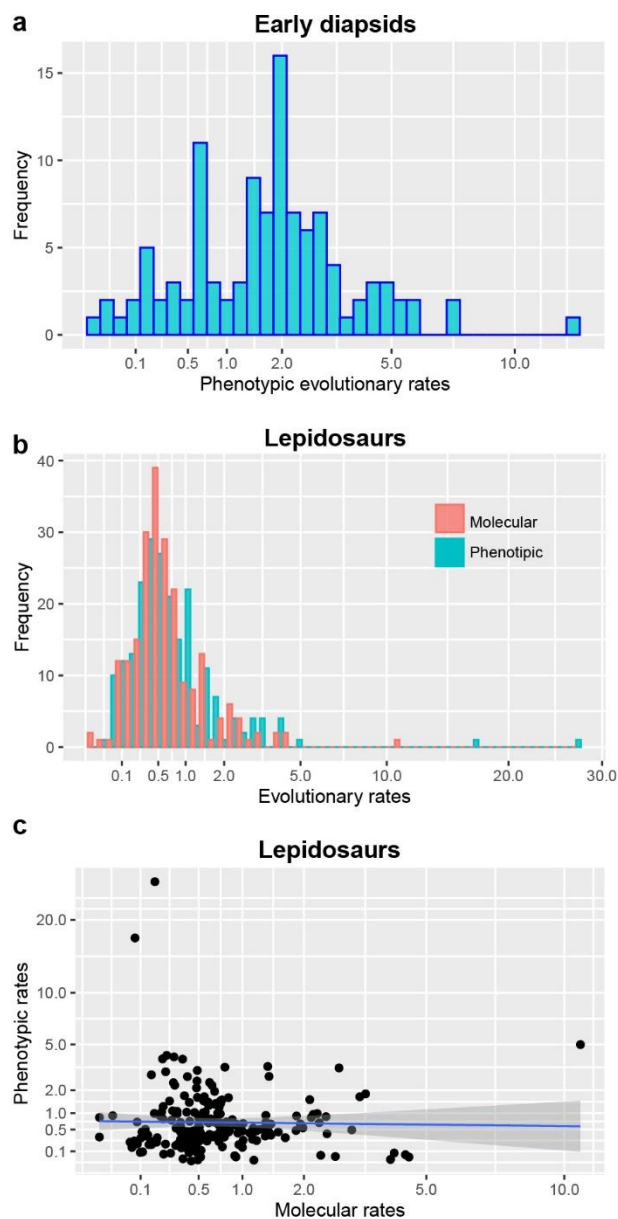

699

700 **Fig. 1. Distribution of phenotypic and molecular rates in different reptile groups. A,**  
701 **distribution of phenotypic rates among early evolving diapsid lineages (median=1.9; mean=2.1).**  
702 **b,** **distribution of phenotypic (median=0.51; mean=1.0) and molecular rates (median=0.54;**  
703 **mean=0.83) among lepidosaurs. c,** **linear regression between phenotypic and molecular rates (R-**  
704 **squared: 0.0001425; p-value: 0.8615) among lepidosaurs.**

705



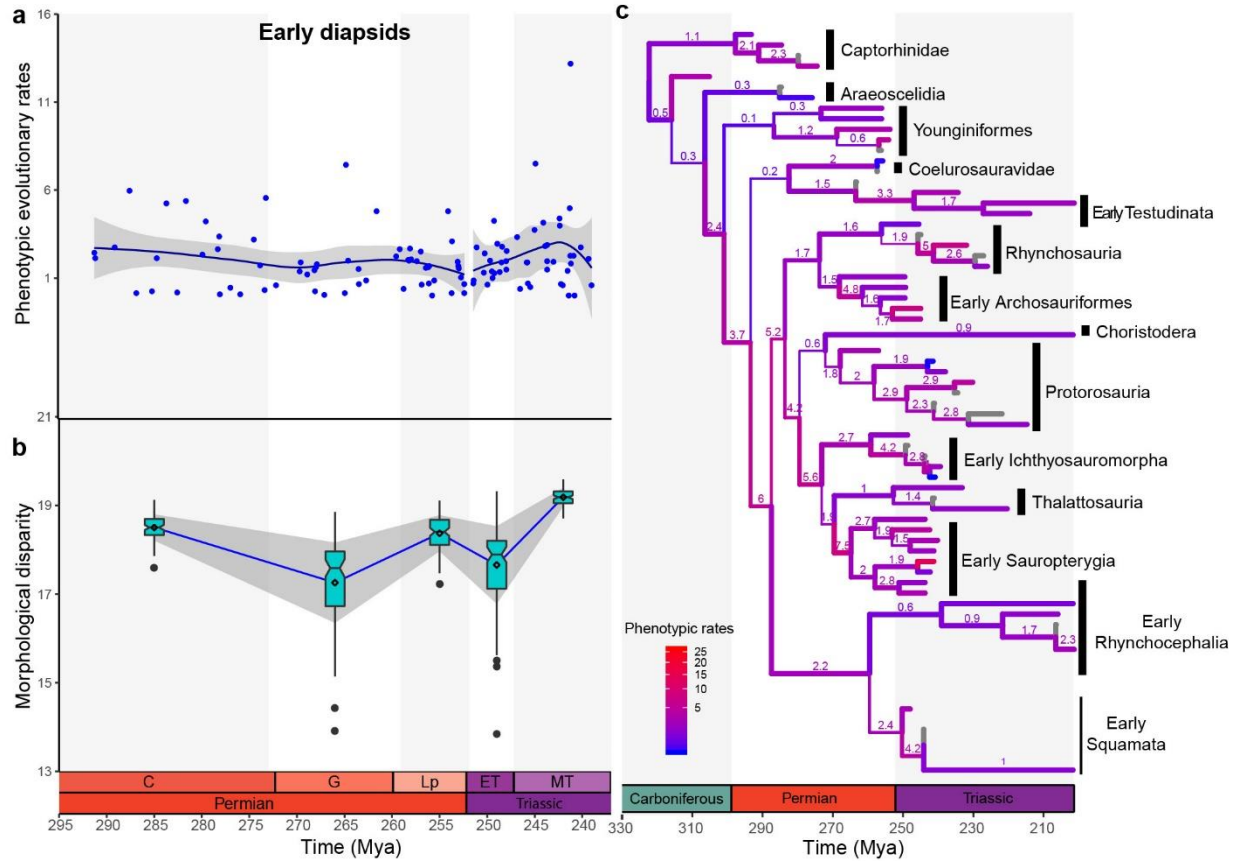

706

707 **Fig 2. Phenotypic evolutionary rates and disparity through time in early diapsid reptiles.** a,  
 708 phenotypic rates among the major early evolving diapsid reptile lineages from the Early Permian  
 709 to the Middle Triassic obtained from all unique bipartitions from the posterior trees. LOESS-  
 710 smoothing trendline represent evolutionary rate fluctuations through time; grey area represents  
 711 95% confidence interval. Carboniferous rates are not considered here due to low sample size and  
 712 extremely large confidence intervals. B, phenotypic disparity in early diapsids through time. Box  
 713 plots represent distribution of 100 bootstraps at each time bin, with notching around the median  
 714 and diamond indicating means. Blue trendline passes through median values and grey area  
 715 represents one standard deviation. c, phenotypic rates of evolution in reptiles plotted on the time-  
 716 calibrated maximum compatible tree from Mr. Bayes. Branch width proportional to posterior  
 717 probabilities and branch values represent absolute phenotypic rates (character change per million  
 718 year). For full tree see Supplementary Information.

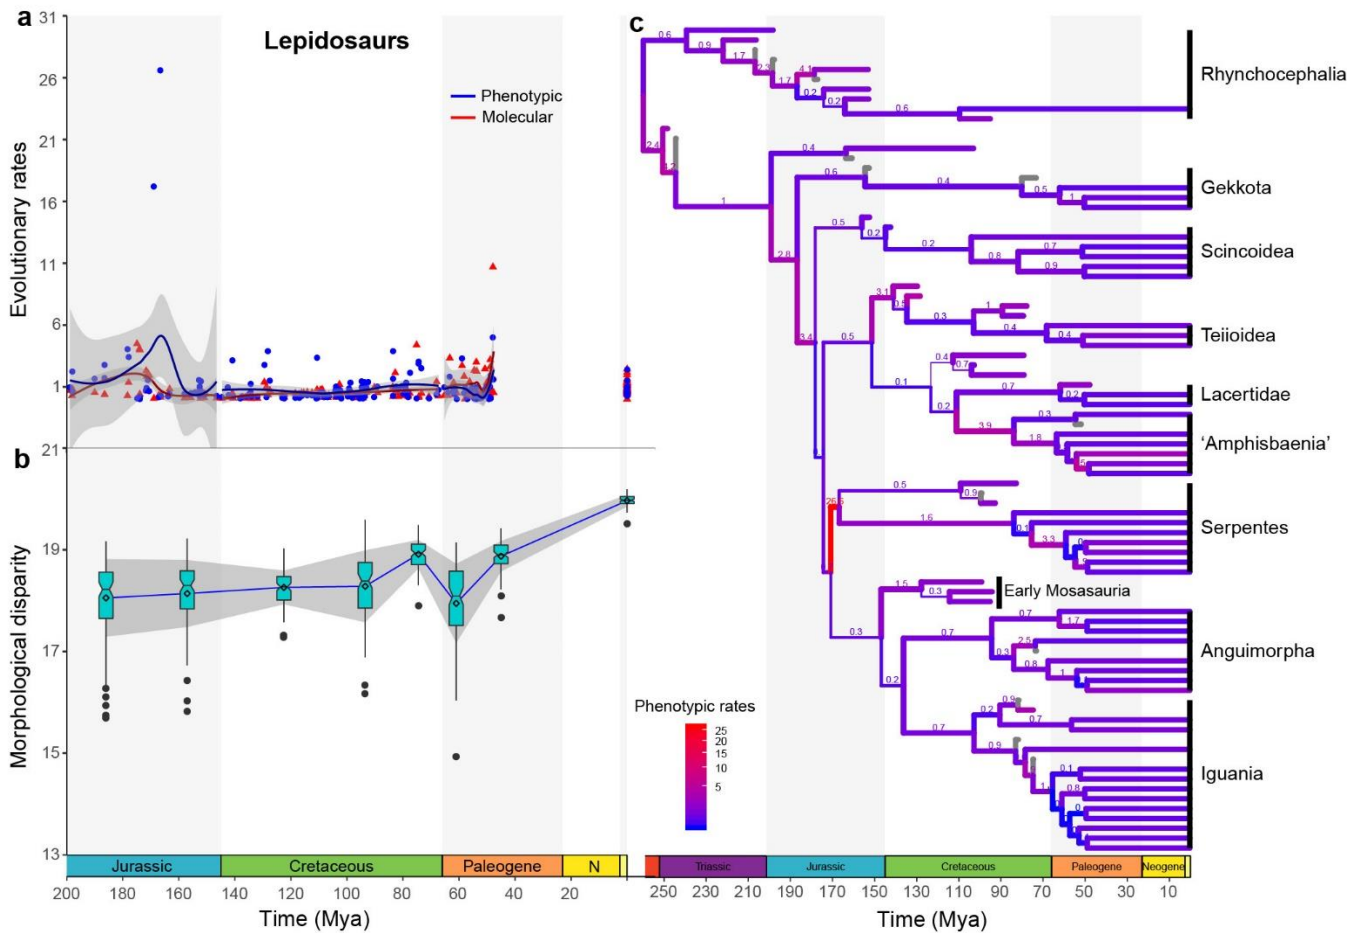

7:

720 **Fig 3. Phenotypic and molecular evolutionary rates and disparity through time in**  
 721 **lepidosaurs. a**, phenotypic and molecular rates among the major lepidosaur lineages from the  
 722 Jurassic to the present time obtained from all unique bipartitions from the posterior trees.  
 723 LOESS-smoothing trendline represent evolutionary rate fluctuations through time; grey area  
 724 represents 95% confidence interval. Triassic rates are not considered here due to low sample size  
 725 and extremely large confidence intervals. **b**, phenotypic disparity in early diapsids through time.  
 726 Box plots represent distribution of 100 bootstraps at each time bin, with notching around the  
 727 median and diamond indicating means. Blue trendline passes through median values and grey  
 728 area represents one standard deviation. **c**, phenotypic rates of evolution in reptiles plotted on the  
 729 time-calibrated maximum compatible tree from Mr. Bayes. Branch width proportional to  
 730 posterior probabilities and branch values represent absolute phenotypic rates (character change  
 731 per million year). For full tree see Supplementary Information.

732

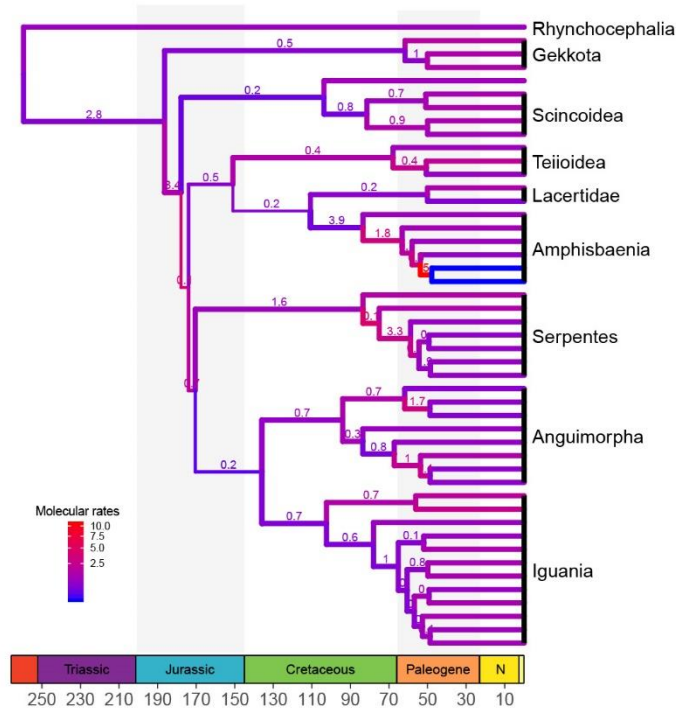

733

734 **Fig 4. Molecular rates of evolution in lepidosaurs plotted on the time-calibrated maximum**  
735 **compatible tree.** Molecular rates are plotted for all sampled extant taxa and internal branches  
736 until their most recent common ancestor. Branch width proportional to posterior probabilities  
737 and branch values represent absolute molecular rates (substitutions per million year). For full tree  
738 see Supplementary Information.

739

740

741

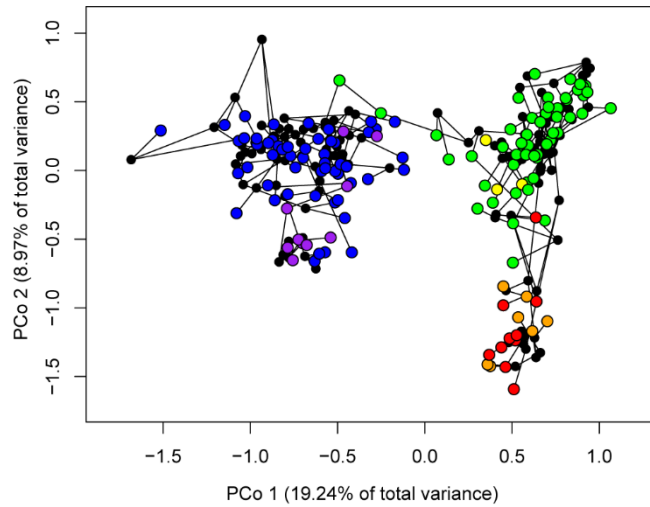

742 Rhynchocephalia      Fully-limbed squamates      Mosasauria  
743 Serpentes      'Amphisbaenia'      Other diapsids

744 **Fig 5. Phylomorphospace of diapsid reptiles.** The first two axes of phenotypic variation among  
745 principal coordinates. Early diapsid reptiles occupy a distinct region of the morphospace from  
746 lepidosaurs, which in turn, have rhynchocephalians, non-serpentiform squamates, and  
747 serpentiform squamates (snakes and amphisbaenians) occupying different regions of the  
748 morphospace defined by PCo 1 and 2.  
749

750

751
